## NRSF-GNAO1-CaMK2 axis exacerbates cardiac remodeling and progresses heart failure by impairing Ca<sup>2+</sup> homeostasis

H. Inazumi<sup>1</sup>, K. Kuwahara<sup>2</sup>, Y. Kuwabara<sup>1</sup>, Y. Nakagawa<sup>1</sup>, H. Kinoshita<sup>1</sup>, K. Moriuchi<sup>1</sup>, H. Yanagisawa<sup>1</sup>, T. Nishikimi<sup>1</sup>, M. Oya<sup>2</sup>, M. Yamada<sup>2</sup>, T. Kashiwara<sup>2</sup>, N. Kurebayashi<sup>3</sup>, M. Sugihara<sup>3</sup>, K. Nakao<sup>1</sup>, T. Kimura<sup>1</sup>

<sup>1</sup> Kyoto University Graduate School of Medicine, Kyoto, Japan; <sup>2</sup> Shinsyu University School of Medicine, matsumoto, Japan; <sup>3</sup> Juntendo University Graduate School of Medicine, Tokyo, Japan

**Funding Acknowledgement:** Type of funding source: Public grant(s) – National budget only. Main funding source(s): Grants-in-Aid for Scientific Research from the Japan Society for the Promotion of Science

**Background:** In the development of heart failure, pathological intracellular signaling reactivates fetal cardiac genes, which leads to maladaptive remodeling and cardiac dysfunction. We previously reported that a transcriptional repressor, neuron restrictive silencer factor (NRSF) represses fetal cardiac genes and maintains normal cardiac function under normal conditions, while hypertrophic stimuli de-repress this NRSF mediated repression via activation of CaMKII. Molecular mechanisms by which NRSF maintains cardiac systolic function remains to be determined, however.

**Purpose:** To elucidate how NRSF maintains normal cardiac homeostasis and identify the novel therapeutic targets for heart failure.

**Methods and results:** We generated cardiac-specific NRSF knockout mice (NRSF cKO), and found that these NRSF cKO showed cardiac dysfunction and premature deaths accompanied with lethal arrhythmias, as was observed in our previously reported cardiac-specific dominant-negative mutant of NRSF transgenic mice (dnNRSF-Tg).

By cDNA microarray analysis of dnNRSF-Tg and NRSF-cKO, we identified that expression of *Gnao1* gene encoding G $\alpha_o$ , a member of inhibitory G proteins, was commonly increased in ventricles of both types of mice. ChIP-seq analysis, reporter assay and electrophoretic mobility shift assay identified that NRSF transcriptionally regulates *Gnao1* gene expression. Genetic Knockdown of G $\alpha_o$  in dnNRSF-Tg and NRSF-cKO by crossing these mice with *Gnao1* knockout mice ameliorated the reduced systolic function, increased arrhythmogenicity and reduced survival rates.

Transgenic mice expressing a human GNAO1 in their hearts (GNAO1-Tg) showed progressive cardiac dysfunction with cardiac dilation. Ventricles obtained from GNAO1-Tg have increased phosphorylation level of CaMKII and increased expression level of endogenous mouse *Gnao1* gene. These data suggest that increased cardiac expression of G $\alpha_o$  is sufficient to induce pathological Ca<sup>2+</sup>-dependent signaling and cardiac dysfunction, and that G $\alpha_o$  forms a positive regulatory circuit with CaMKII and NRSF.

Electrophysiological analysis in ventricular myocytes of dnNRSF-Tg revealed that impaired Ca<sup>2+</sup> handling via alterations in localized L-type calcium channel (LTCC) activities; decreased T-tubular and increased surface sarcolemmal LTCC activities, underlies G $\alpha_o$ -mediated cardiac dysfunction. Furthermore, we also identified increased expression of G $\alpha_o$  in ventricles of two different heart failure mice models, mice with transverse aortic constriction and mice carrying a mutant cardiac troponin T, and confirmed that genetic reduction of G $\alpha_o$  prevented the progression of cardiac dysfunction in both types of mice.

**Conclusions:** Increased expression of G $\alpha_o$ , induced by attenuation of NRSF-mediated repression forms a pathological circuit via activation of CaMKII. This circuit exacerbates cardiac remodeling and progresses heart failure by impairing Ca<sup>2+</sup> homeostasis. G $\alpha_o$  is a potential therapeutic target for heart failure.

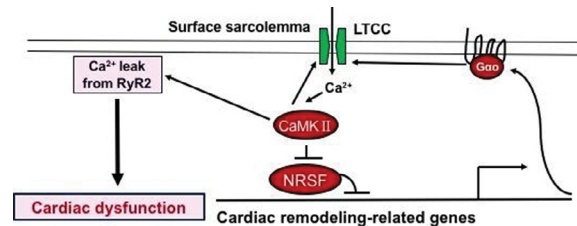

Figure 1
